# Supplementary material for: Near-infrared polarization-sensitive photodetectionviainterfacial symmetry engineering of an Si/MAPbI3heterostructural single crystal
Source: Royal Society of Chemistry journal article supplement (doi:10.1039/d2mh01287a), 2022-12-21
Supplement: d2mh01287a1.pdf [file d2mh01287a1.pdf]

## Supporting information

# Near-Infrared Polarization-Sensitive Photodetection via Interfacial Symmetry Engineering of Si/MAPbI<sub>3</sub> Heterostructural Single Crystal

Jianbo Wu<sup>a, b</sup>, Xinyuan Zhang<sup>a, b</sup>, Ziyang Wang<sup>a</sup>, Lishan Liang<sup>a</sup>, Xinyi Niu<sup>a</sup>, Qianwen Guan<sup>a, b</sup>, Shihai You<sup>a</sup>, and Junhua Luo<sup>\*a, b, c</sup>

a J. Wu, X. Zhang, Z. Wang, L. Liang, X. Niu, Q. Guan, S. You, Prof. J. Luo  
State Key Laboratory of Structural Chemistry  
Fujian Institute of Research on the Structure of Matter, Chinese Academy of Sciences  
Fuzhou, Fujian 350002, P. R. China  
E-mail: jhluo@fjirsm.ac.cn

b J. Wu, X. Zhang, Q. Guan, Prof. J. Luo  
University of Chinese Academy of Sciences  
Beijing 100049, P. R. China

c Prof. J. Luo  
School of Chemistry and Chemical Engineering  
Jiangxi Normal University  
Nanchang, Jiangxi 330022, P. R. China

## Experimental Section

**Materials:** The materials used were lead iodide ( $\text{PbI}_2$ , Aladdin Chemistry Co., Ltd., 99.9%), methylamine iodide (MAI, self-synthesized),  $\gamma$ -butyrolactone (GBL, Shanghai Tichem Chemical Co., Ltd, 99.8%), (3-aminopropyl)triethoxysilane (APTES, Aladdin Chemistry Co., Ltd., >99%), 1,2-dichlorobenzene (DCB, Aladdin Chemistry Co., Ltd., >99%), hydroiodic acid (HI, Aladdin Chemistry Co., Ltd., 48% wt/wt aq), 2-propanol (IPA, Aladdin Chemistry Co., Ltd., >99.5%)

**Preparation of the precursor solutions:** The raw materials 2.305 g  $\text{PbI}_2$  and 0.795 g MAI were dissolved in 5 mL GBL solvent. A bright-yellow solution was obtained.

**Growth of  $\text{MAPbI}_3$  single crystal:**  $\text{MAPbI}_3$  single crystals were grown via inverse-temperature crystallization method. The precursor solution was transferred to a vial and then heat up to  $100^\circ\text{C}$  in oil bath and maintained hours under this temperature for the growth of the single crystal.

**Preparation of modified Si substrate:** The method of modifying Si substrate was in accordance with the previous report. The precleaned Si (n-type) wafer was placed into a mixture of DCB and APTES solvent (20:1) for 12 h at  $50^\circ\text{C}$  and ultrasonically rinsed with IPA to obtain  $\text{NH}_2$ -terminated molecules on the surface. The wafer was then treated with HI (aq.) to convert the amino groups into  $-\text{NH}_3\text{I}$  groups.

**Growth of Si-integrated  $\text{MAPbI}_3$  single crystal:** A small droplet of the  $\text{MAPbI}_3/\text{GBL}$  solution was dropped onto the modified Si wafer. Then, the Si wafer with small droplet was heat to  $50^\circ\text{C}$  to volatilize the solvent and obtain the seed crystal. After that, the Si wafer with the seed crystal was placed into the preheat  $\text{MAPbI}_3/\text{GBL}$  solution for the growth of the Si-integrated  $\text{MAPbI}_3$  single crystal. The solution was heated to  $100^\circ\text{C}$  and maintained this temperature for hours.

**Powder X-ray diffraction:** Powder X-ray diffraction measurement was performed on a Rigaku MiniFlex 600 diffractometer at atmosphere environment. The diffraction patterns were collected in the  $2\theta$  range of  $5^\circ$ – $50^\circ$  with a step size of  $0.5^\circ/\text{min}$ .

**Scanning electron microscope measurement (SEM):** The SEM image was collected on ZEISS Sigma 300 field-emission scanning electron microscope operated at 3kV.

**Absorption spectrum measurement:** Absorption spectrums of  $\text{MAPbI}_3$  was performed on a Perkin-Elmer Lambda 900 UV–Vis–NIR spectra photometer at room temperature. In which  $\text{BaSO}_4$  was used as the 100% reflectance reference.

**Photoluminescence spectra measurements:** Emission spectra of  $\text{MAPbI}_3$  and the  $\text{MAPbI}_3/\text{Si}$  heterojunction were performed on an Edinburgh FLS1000 fluorescence spectrometer. The lifetime of  $\text{MAPbI}_3$  and the  $\text{MAPbI}_3/\text{Si}$  heterojunction were measured on an Edinburgh FLS1000 fluorescence spectrometer using a picosecond pulsed diode laser. The dynamics of emission decay were monitored by using the FLS1000's time-correlated single-photon counting capability (1,024 channels; 500 ns window) with data collection for 10,000 counts in the maximum channel.

**Optoelectronic performances measurements:** The current vs voltage (I–V) and photocurrent vs time (I–t) with light on and off (measured at zero bias) were measured using a high precision electrometer (Keithley 6517B). I–V tests were collected under the 405 nm, 520 nm, 637 nm and 785 nm continuous-wave lasers (ITC4001). I–t was collected under the 785 nm continuous-wave lasers (ITC4001). The incident light intensity was measured by light power meter.

## Results and Discussion

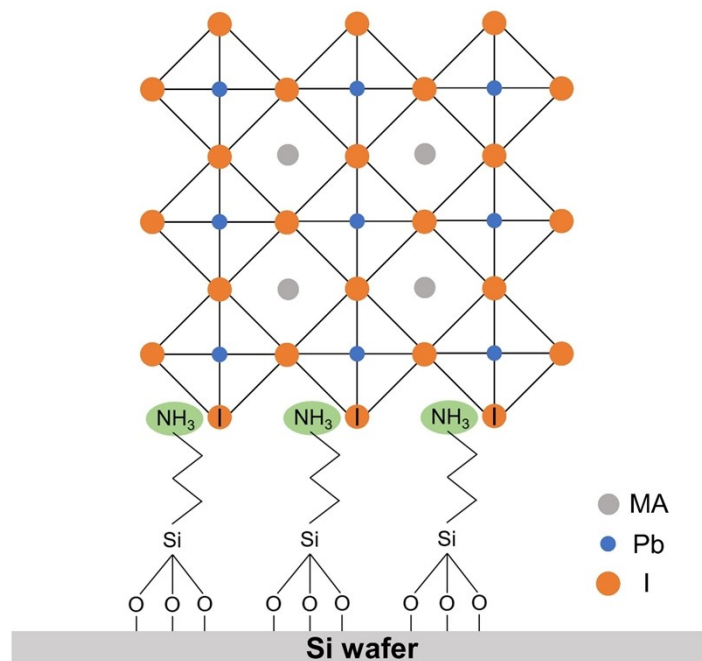

Figure S1. Schematic of the MAPbI<sub>3</sub>/Si heterostructure

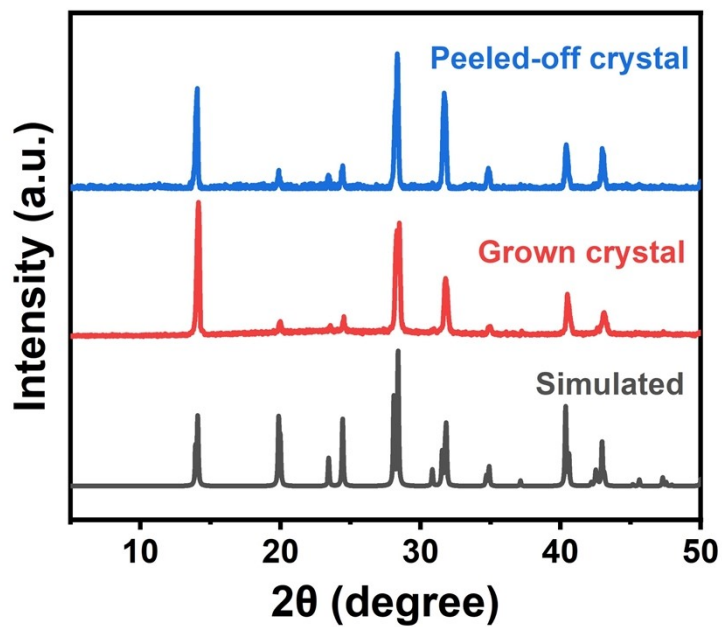

Figure S2. PXRD patterns of the simulation of MAPbI<sub>3</sub> crystal, naturally grown crystal, and the peeled-off MAPbI<sub>3</sub> crystal from the Si wafer.

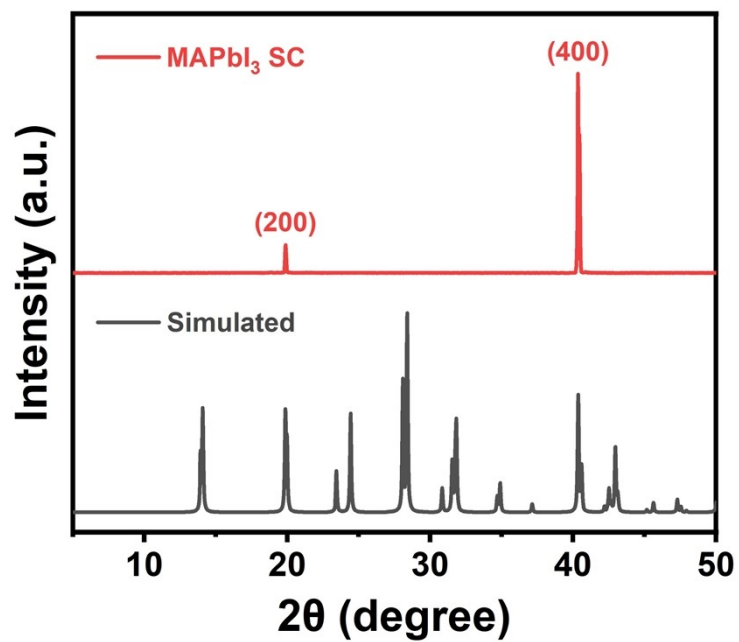

Figure S3. XRD pattern of the MAPbI<sub>3</sub> single crystal.

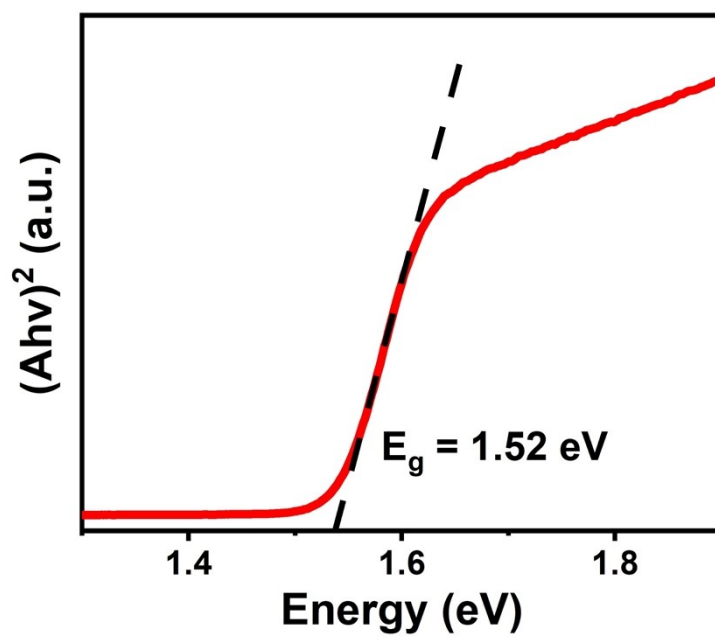

Figure S4. The calculation of MAPbI<sub>3</sub> optical band gap via corresponding Tauc plots.

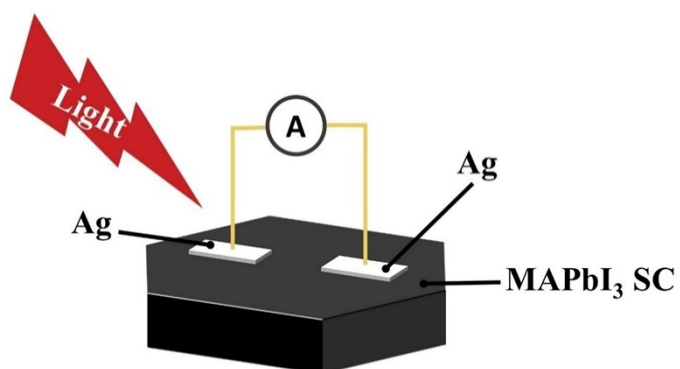

Figure S5. Schematic illustration of the MAPbI<sub>3</sub> SC device.

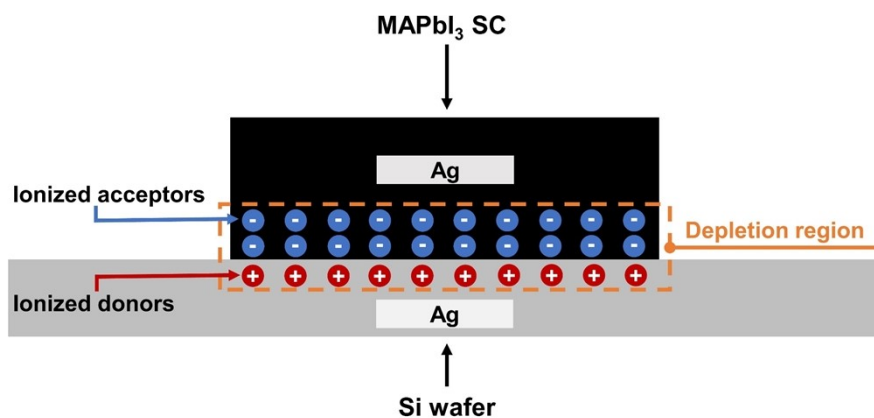

Figure S6. A schematic of depletion region at the MAPbI<sub>3</sub>/Si heterostructure interface

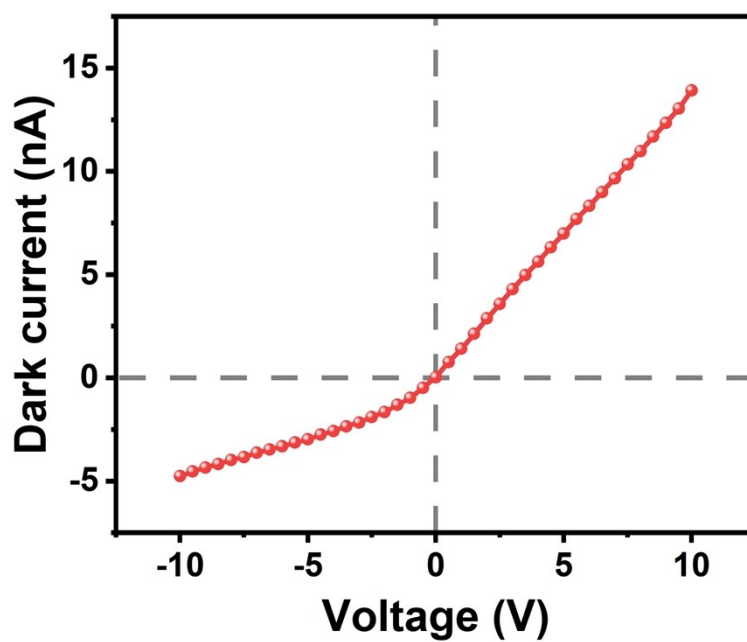

Figure S7. Dark current of the heterojunction photodetector

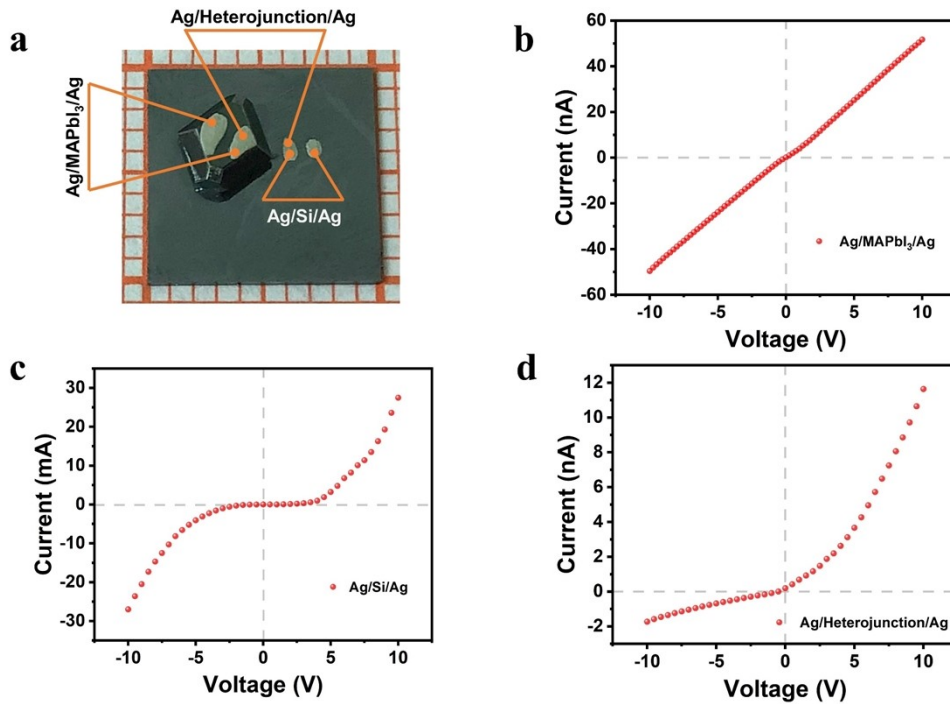

**Figure S8.** (a) Photograph of Ag/MAPbI<sub>3</sub>/Ag, Ag/Si/Ag and Ag/Heterojunction/Ag device in the same heterostructure sample. (b) *I*-*V* curve of Ag/MAPbI<sub>3</sub>/Ag under the dark condition. (c) *I*-*V* curve of Ag/Si/Ag under the dark condition. (d) *I*-*V* curve of Ag/Heterojunction/Ag under the dark condition.

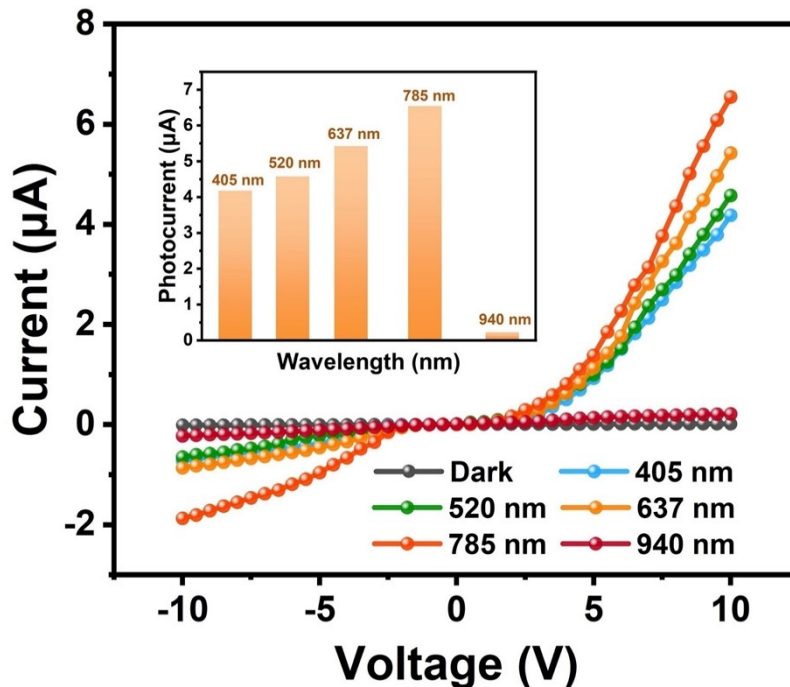

**Figure S9.** *I*-*V* curves of the heterojunction photodetector under the different wavelength illumination at the power density of 19.4 mW/cm<sup>2</sup>. The insert shows the photocurrents of the heterojunction device as a function of wavelength.

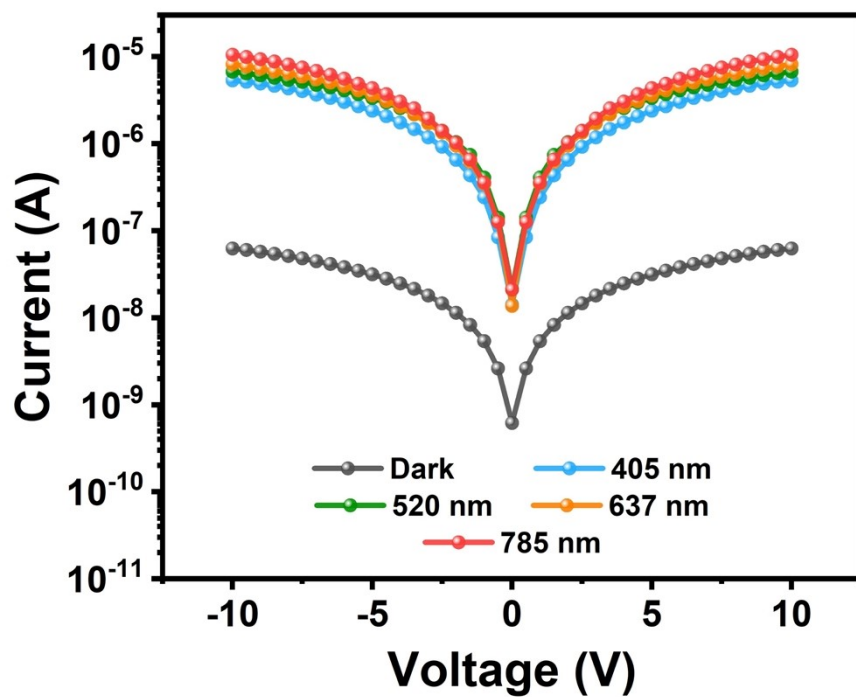

**Figure S10.**  $I$ - $V$  curves of the MAPbI<sub>3</sub> SC photodetector under the different wavelength illumination at the power density of 19.4 mW/cm<sup>2</sup>.

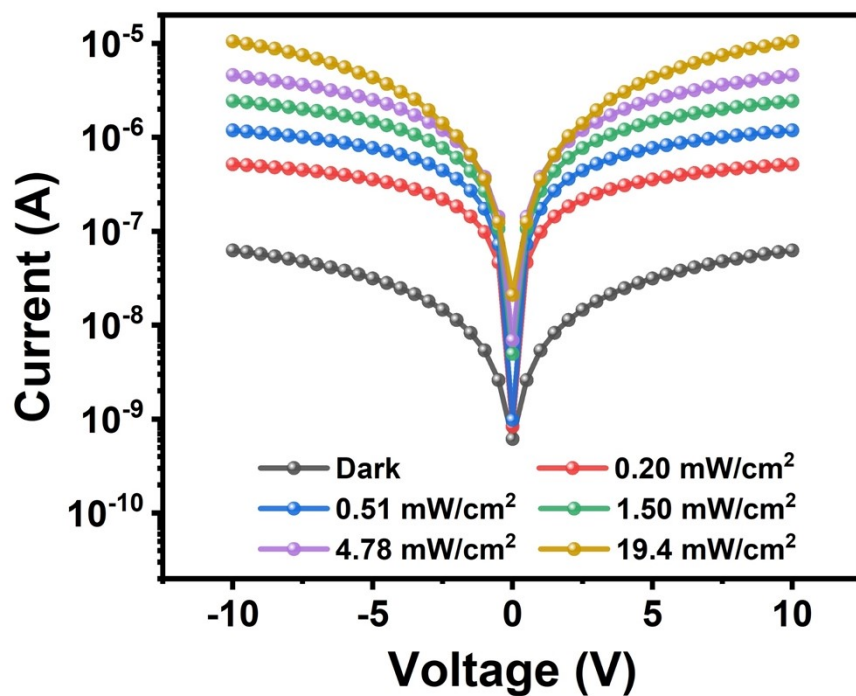

**Figure S11.**  $I$ - $V$  curves of the MAPbI<sub>3</sub> SC photodetector under the 785 nm illumination with different power density.



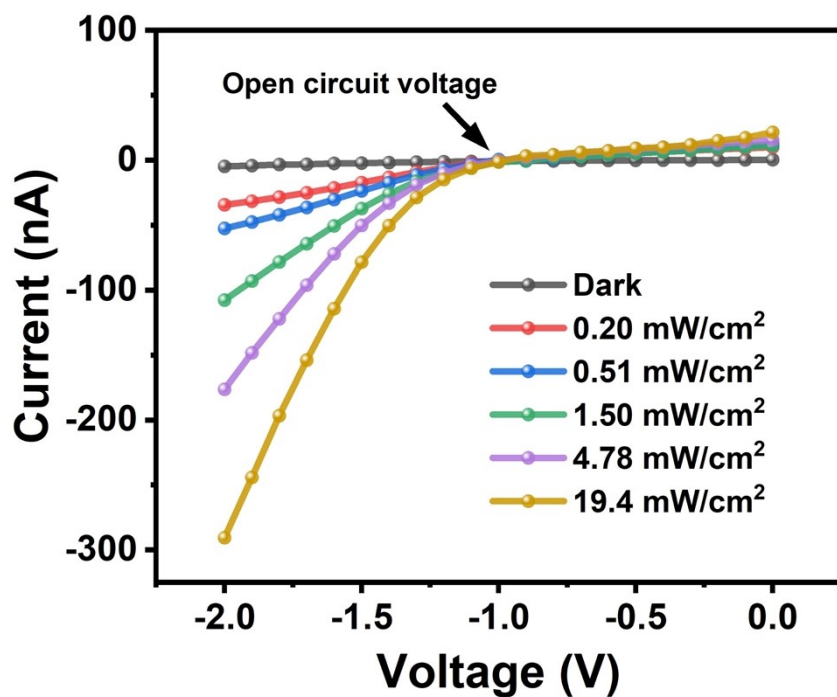

Figure S12. Open-circuit voltage of the heterojunction device.

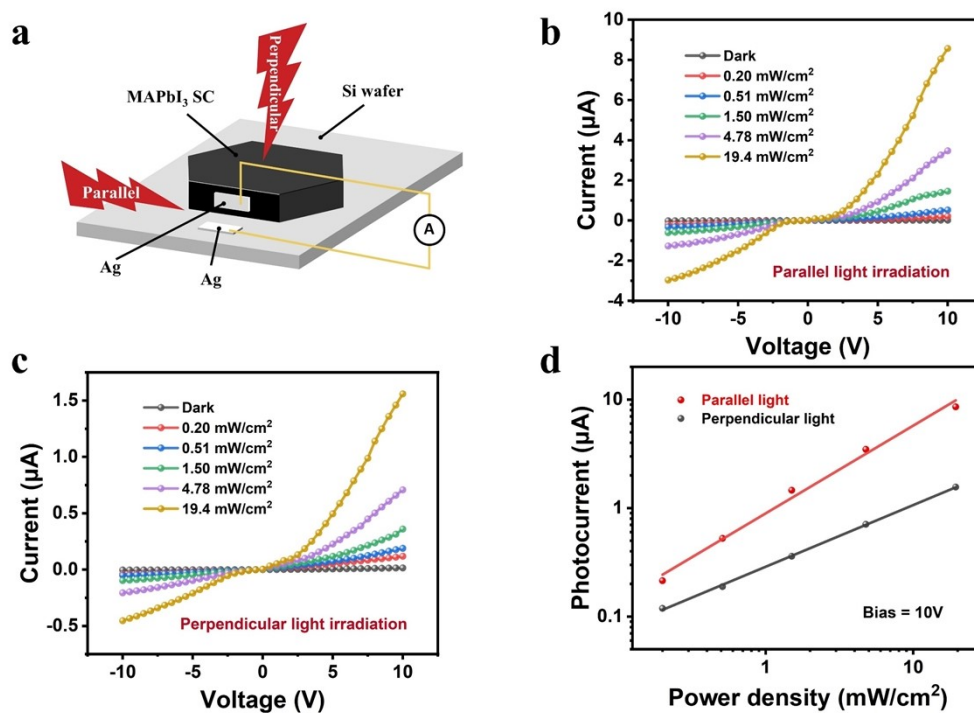

Figure S13. (a) Schematic illustration of the MAPbI<sub>3</sub>/Si heterostructure photodetector with different incident directions. (b) *I-V* curves of heterostructure photodetector with parallel light irradiation. (c) *I-V* curves of heterostructure photodetector with perpendicular light irradiation. (d) Light power density dependent photocurrent with different incident directions.

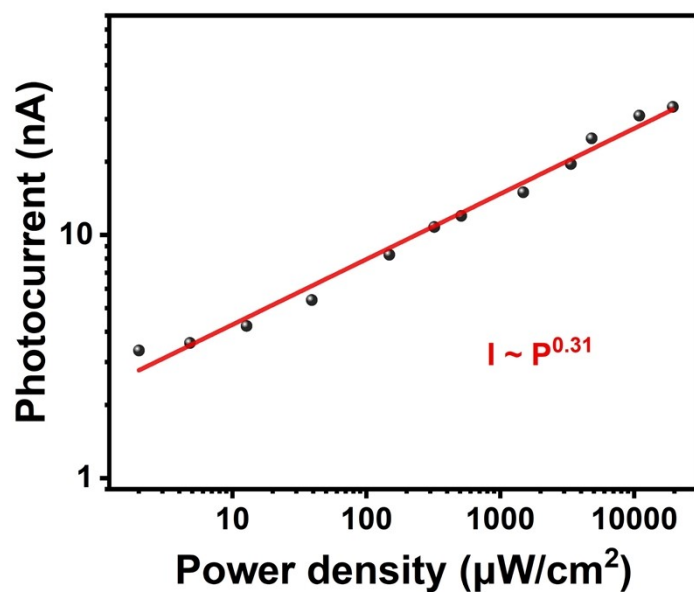

**Figure S14.** Light power density dependent photocurrent of the MAPbI<sub>3</sub>/Si device under the self-driven mode.

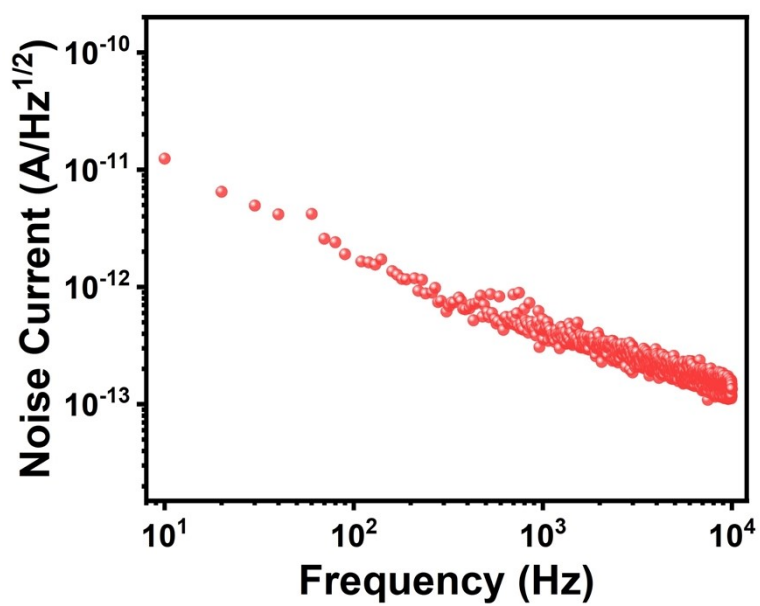

**Figure S15.** The current noise power spectra at 0 V bias.

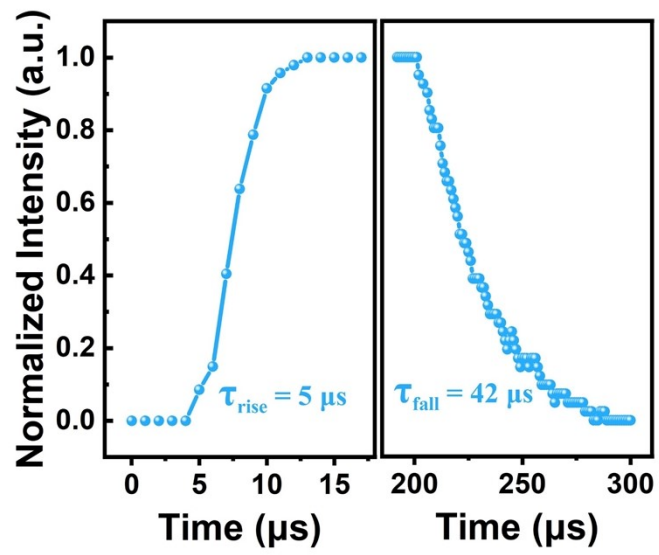

**Figure S16.** The response time of the heterojunction photodetector under the self-powered mode at 785 nm.

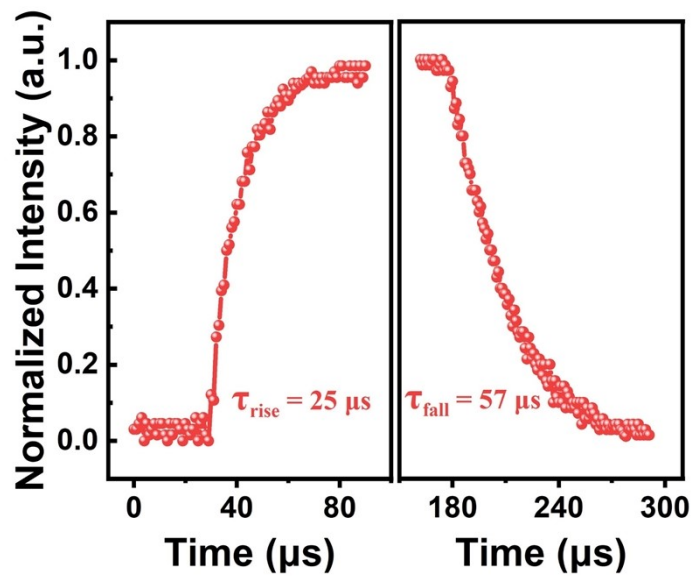

**Figure S17.** The response time of the heterojunction photodetector under the self-powered mode at 940 nm.

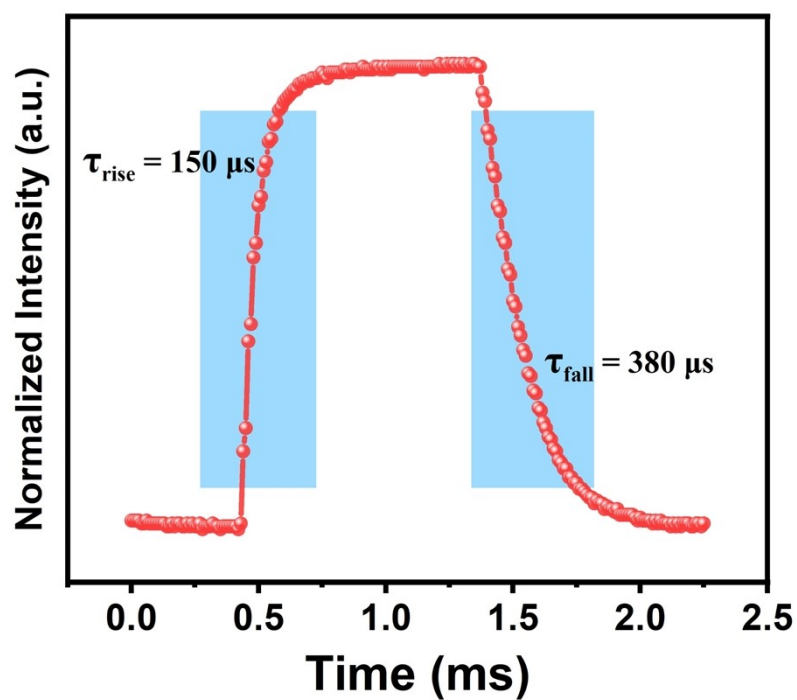

Figure S18. The response time of the MAPbI<sub>3</sub> SC photodetector under 10 V bias at 785 nm.

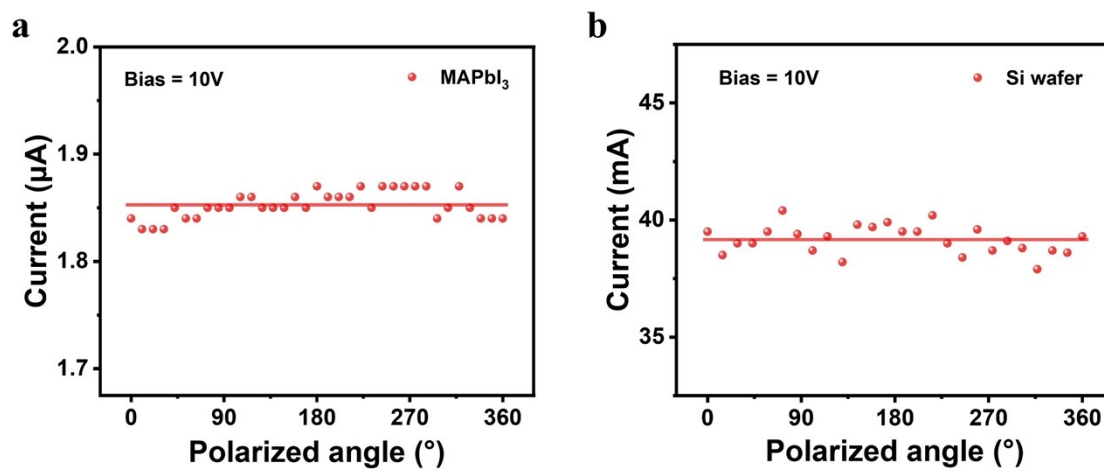

Figure S19. Polarized photocurrent of the pure (a) MAPbI<sub>3</sub> and (b) Si.

Table S1. Performance comparison of MAPbI<sub>3</sub>/Si heterojunction NIR polarization-sensitive photodetector with other devices.

| Devices                                       | $\lambda$ (nm) | $D^*$ (Jones)         | Polarized ratio              | Condition    | Ref.      |
|-----------------------------------------------|----------------|-----------------------|------------------------------|--------------|-----------|
| MAPbI <sub>3</sub> /Si                        | 405-940        | $7.35 \times 10^{12}$ | 2.8 @ 940 nm<br>3.3 @ 785 nm | Self-powered | This work |
| MAPbI <sub>3</sub> single crystal             | 275-790        | -                     | -                            | 1 V          | 1         |
| MAPbI <sub>3</sub> /graphene                  | 260-900        | $4.5 \times 10^{11}$  | -                            | Self-powered | 2         |
| MAPbI <sub>3</sub> /PDPP3T                    | 300-937        | $1.5 \times 10^{10}$  | -                            | 1 V          | 3         |
| PTAA/MAPbI <sub>3</sub> /C <sub>60</sub> /BCP | 350-800        | $7.8 \times 10^{12}$  | -                            | 0.1 V        | 4         |
| MAPbI <sub>3</sub> nanocrystal                | 400-980        | $1.77 \times 10^{13}$ | -                            | Self-powered | 5         |
| MAPbI <sub>3</sub> nanoribbon                 | 300-800        | $8.21 \times 10^{11}$ | 1.44 @ white light           | 2 V          | 6         |
| MAPbI <sub>3</sub> nanowires                  | 530            | $2 \times 10^{13}$    | 1.3 @ 530 nm                 | 1 V          | 7         |
| MAPbI <sub>3</sub> needlecrystal              | 405            | -                     | 1.57 @ 405 nm                | 5 V          | 8         |
| MAPbI <sub>3</sub> nanowires                  | 200-1000       | $4.73 \times 10^{12}$ | 2.2 @ 520 nm                 | 1 V          | 9         |

## References

- 1 Z. Lian, Q. Yan, Q. Lv, Y. Wang, L. Liu, L. Zhang, S. Pan, Q. Li, L. Wang, J. L. Sun, *Sci. Rep.* **2015**, *5*, 16563-16573.
- 2 J. Li, S. Yuan, G. Tang, G. Li, D. Liu, J. Li, X. Hu, Y. Liu, J. Li, Z. Yang, S. F. Liu, Z. Liu, F. Gao, F. Yan, *ACS Appl. Mater. Interfaces* **2017**, *9*, 42779-42787.
- 3 S. Chen, C. Teng, M. Zhang, Y. Li, D. Xie, G. Shi, *Adv. Mater.* **2016**, *28*, 5969-5974.
- 4 L. Shen, Y. Fang, D. Wang, Y. Bai, Y. Deng, M. Wang, Y. Lu, J. Huang, *Adv. Mater.* **2016**, *28*, 10794-10800.
- 5 C. Perumal Veeramalai, S. Yang, R. Zhi, M. Sulaman, M. I. Saleem, Y. Cui, Y. Tang, Y. Jiang, L. Tang, B. Zou, *Adv. Opt. Mater.* **2020**, *8*, 2000215-2000224.
- 6 S. Lim, M. Ha, Y. Lee, H. Ko, *Adv. Opt. Mater.* **2018**, *6*, 1800615-1800624.
- 7 L. Gao, K. Zeng, J. Guo, C. Ge, J. Du, Y. Zhao, C. Chen, H. Deng, Y. He, H. Song, G. Niu, J. Tang, *Nano Lett.* **2016**, *16*, 7446-7454.
- 8 Z. Zhao, Y. Li, Y. Du, L. Zhang, J. Wei, F. Lin, *ACS Appl. Mater. Interfaces* **2020**, *12*, 44248-44255.
- 9 R. Huang, D.-H. Lin, J.-Y. Liu, C.-Y. Wu, D. Wu, L.-B. Luo, *Sci. China Mater.* **2021**, *64*, 2497-2506.
